# Supplementary material
Source: publisher figshare collection journal article supplement (https://acs.figshare.com/ndownloader/files/18601649)
Supplement: Supplementary file 1 [file 18601649]

## Supporting Information

### Tensorial modulation of electrokinetic streaming potentials on air and liquid filled surfaces

B. Fan & P. R. Bandaru

Program in Materials Science,

Department of Mechanical Engineering, University of California, San Diego,

La Jolla, California, 92093, USA

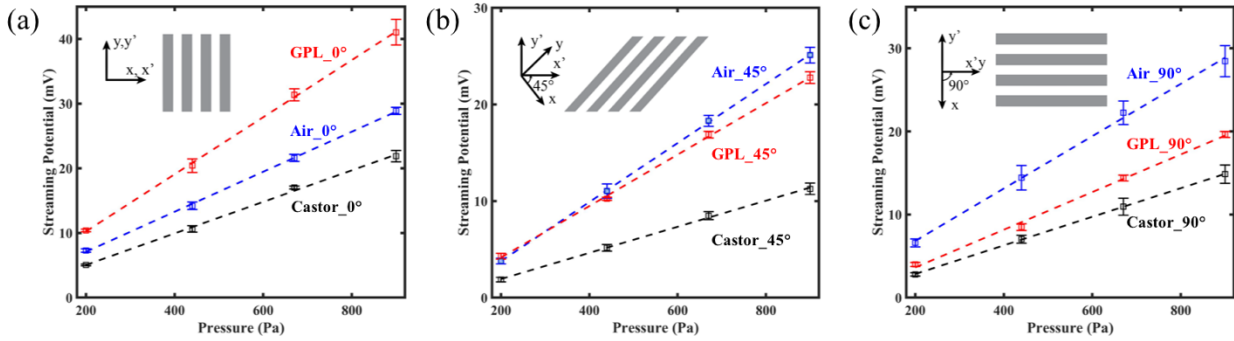

**Figure S1.** The measured  $V_s$  over an *AFS*, castor oil filled *LFS*, and GPL oil filled *LFS*, as a function of groove orientation angle, (a)  $\theta = 0^\circ$ , (b)  $\theta = 45^\circ$  and (c)  $\theta = 90^\circ$ . It was noted that the  $V_s$  of the GPL filled *LFS* is larger than that of *AFS* only for  $\theta = 0^\circ$ , while the  $V_s$  of *AFS* is always larger than that of *LFS* for both  $\theta = 45^\circ$  and  $\theta = 90^\circ$ .

**Table S1** Values of streaming mobilities at principal directions for *AFS* and *LFS* (at 0.1 mM

electrolyte concentration,  $\sigma = 0.001$  S/m,  $\frac{dP}{dx'} = 7627$  Pa/m).

|                   | $M_x$<br>( $10^{-5}$ mV. S. Pa/m) | $M_y$<br>( $10^{-5}$ mV. S. Pa/m) | $M_x - M_y$<br>( $10^{-5}$ mV. S. Pa/m) |
|-------------------|-----------------------------------|-----------------------------------|-----------------------------------------|
| <i>AFS</i>        | -3.21                             | -3.16                             | -0.05                                   |
| Castor <i>LFS</i> | -2.43                             | -1.65                             | -0.78                                   |
| GPL <i>LFS</i>    | -4.56                             | -2.18                             | -2.38                                   |
